# Supplementary material for: Achievement of a giant electromechanical conversion coefficient in a molecule-based ferroelectric
Source: Royal Society of Chemistry journal article supplement (doi:10.1039/d4sc04185b), 2024-01-01
Supplement: d4sc04185b3.pdf [file d4sc04185b3.pdf]

## **Achievement of a Giant Electromechanical Conversion Coefficient in a Molecular-based Ferroelectric**

Bin Wang †, Zhirui Li †, Zhengxiao Tang, Haixia Zhao \*, Lasheng Long \*, Lansun Zheng

Collaborative Innovation Center of Chemistry for Energy Materials, State Key Laboratory of Physical Chemistry of Solid Surfaces and Department of Chemistry, College of Chemistry and Chemical Engineering, Xiamen University, Xiamen, 361005, Fujian. China.

\*Correspondence: [hxzhao@xmu.edu.cn](mailto:hxzhao@xmu.edu.cn); [lslong@xmu.edu.cn](mailto:lslong@xmu.edu.cn)

## 1. Experiment section

### XRD measurement

X-ray crystallographic and powder X-ray diffraction (PXRD) measurements. The single crystal data for **1** were collected using an Agilent Supernova CCD diffractometer utilizing Cu  $K_\alpha$  radiation ( $\lambda = 1.54178 \text{ \AA}$ ) in  $\omega$ -scan mode ( $\Delta\omega = 1.0^\circ$ ) at room temperature. The CrysAlis PRO program was applied to execute data collection, cell refinement and data reduction. The structures were determined by direct methods using ShelXT and refined by full-matrix least squares on  $F^2$  by using ShelXL in the OLEX2 program. CCDC 2190250 (**1**) can be obtained free of charge from the Cambridge Crystallographic Data Centre and contain the supplementary crystallographic data for this paper.

### TG measurement

Thermogravimetric analyses (TG) were performed with alumina crucibles by using an SDT-Q600 thermal analyzer (TA instrument) operated at a heating rate of  $10 \text{ K}\cdot\text{min}^{-1}$  under an air atmosphere.

### SHG measurement

Optical second harmonic generation (SHG) measurements were carried out with an integrated instrument, which ensured low divergence (pulsed Nd:YAG at a wavelength of 1064 nm, 10 Hz repetition rate, 1.6 MW peak power, 5 ns pulse duration) for the unexpanded laser (OPOTEK, 355 II). SHG experiments were performed using powder samples at room temperature.

### $d_{33}$ measurement

The powder samples underwent a 12-hour drying process in a vacuum drying oven. Polycrystalline pellets were fabricated through a prototype-mold with a diameter of 10 mm under a pressure of approximately 20 MPa. And the thickness is around 0.5 mm. Electrodes were formed by applying silver paste to both sides of the films. The prepared sample with electrodes were subjected to 30 kV/cm electric field on high-voltage polarization device (DW-P303-1ACDF0, DONG WEN VOLTAGE, China) for a duration of for 30 mins at room temperature. Then, calibrate the  $d_{33}$  measuring instrument (ZJ-6A). After that, both electrode-painted surfaces of polycrystalline pellet of **1** were connected to the two probes of the  $d_{33}$  meter. Measure at least 10 samples following the standard sample test procedure in order to ensure the reliability of test results. And the  $d_{33}$  of polycrystalline pellet of **1** was measured in forward and reverse connection.

### $S-E$ curves measurement

The strain versus electric field ( $S$ - $E$ ) curves were measured in a silicon oil bath by applying an electric field with a triangular waveform at 25 Hz by employing a ferroelectric testing system (Radiant Precision Premier II Technology) coupled with an MTI 2100 photonic sensor.

#### **Dielectric constant measurement**

Dielectric constant measurements were carried out on a Wayne Kerr 6500B analyzer. The dielectric permittivity  $\varepsilon$  ( $\varepsilon = \varepsilon' - i\varepsilon''$ ) measurements adopted the two-probe *a.c.* impedance method. For dielectric constant measurements, sample pellets were prepared with an area and thickness of 78 mm<sup>2</sup> and 0.15 mm, respectively.

#### ***P-E* curves measurement:**

A Radiant Precision Premier II analyzer was used in the polarization–electric field ( $P$ - $E$ ) hysteresis loop measurements. Small electric conductivity contributions were eliminated by adopting the positive up negative down (PUND) method. The polycrystalline thin films were fabricated by slowly evaporating a drop of aqueous solution of **1** onto freshly cleaned ITO-coated glass. The  $P$ - $E$  hysteresis loop measurements were conducted with the copper electrode/sample film/ITO architecture.

## 2. Supplementary Figures

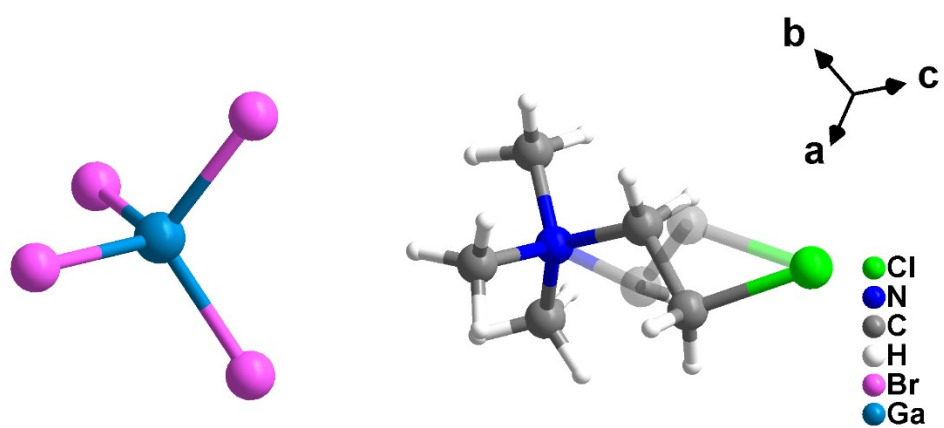

**Fig. S1** The asymmetric unit of **1** at room temperature.

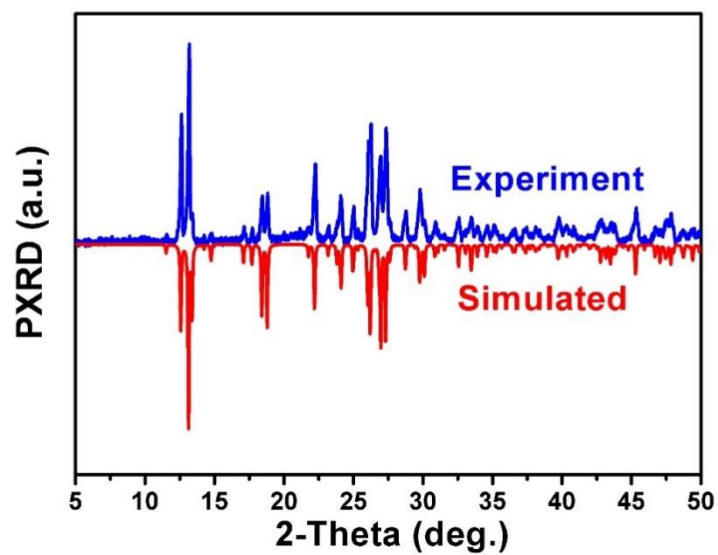

**Fig. S2** PXRD data of **1** at room temperature.

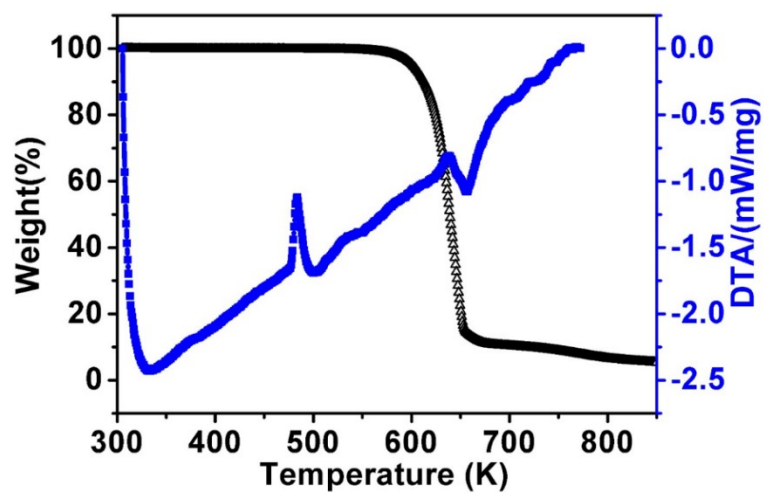

Fig. S3 TG data for 1.

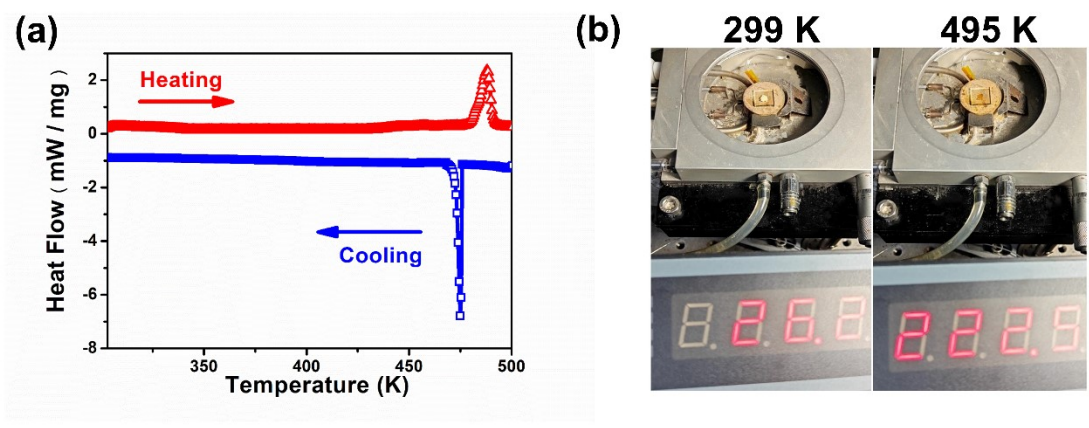

Fig. S4 (a) DSC curves; (b) the photo of compound 1 melting.

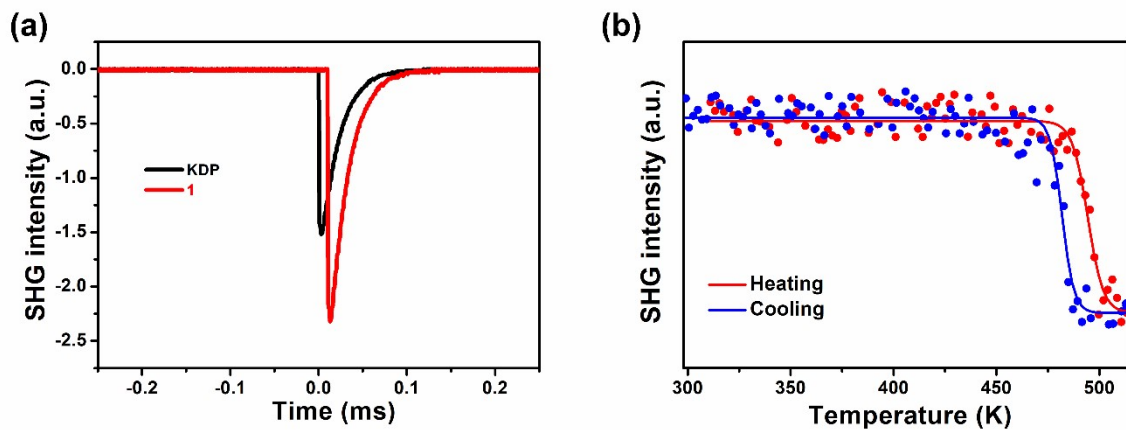

**Fig. S5** SHG data for **1**. (a) the SHG response at room temperature; (b) the temperature dependent SHG response.



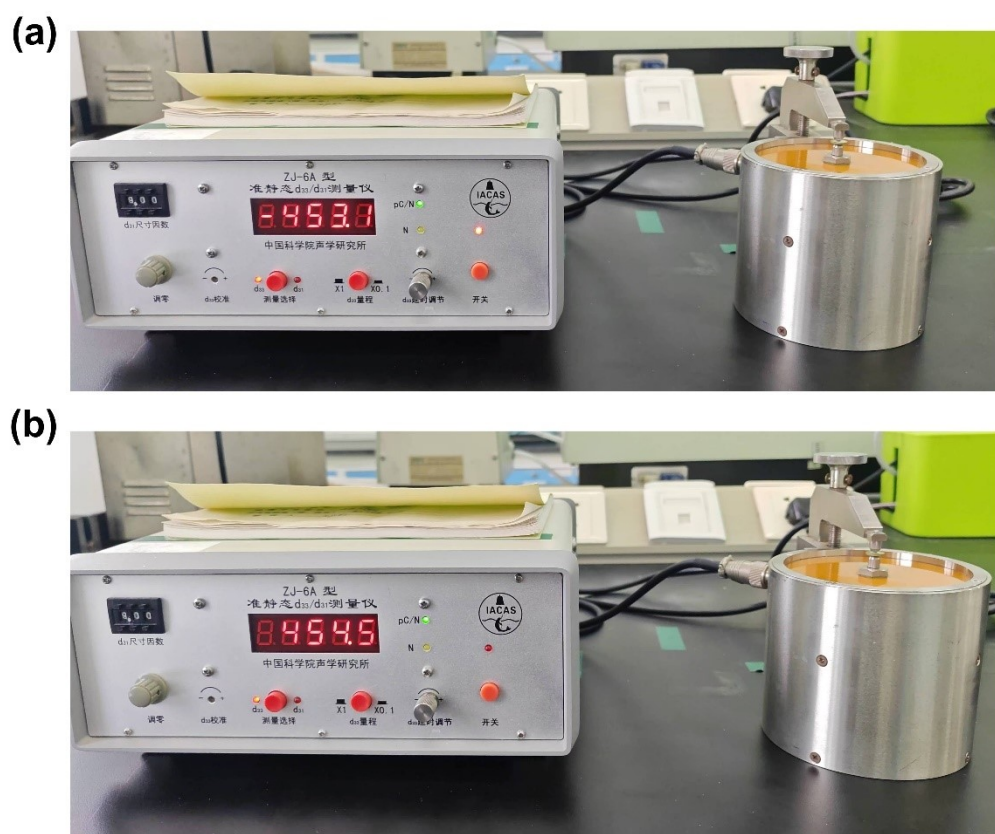

**Fig. S6** Piezoelectric  $d_{33}$  data of polycrystalline pellet of **1** in reverse (a) and forward (b) connection.

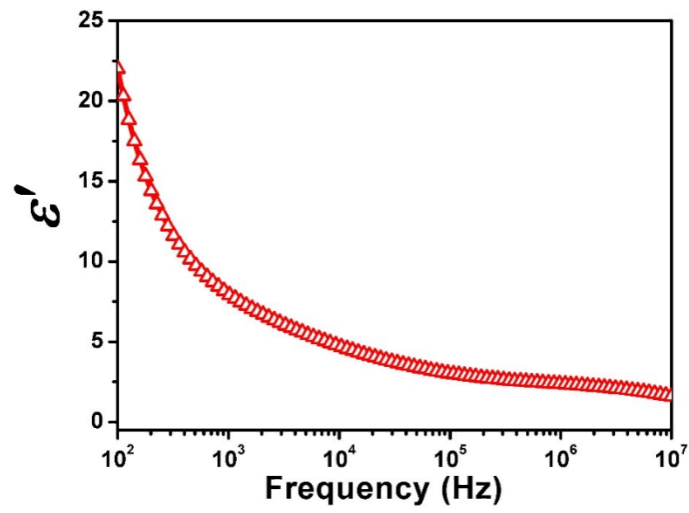

**Fig. S7** Frequency dependence of  $\epsilon'$  for **1** measured at room temperature with powder samples.

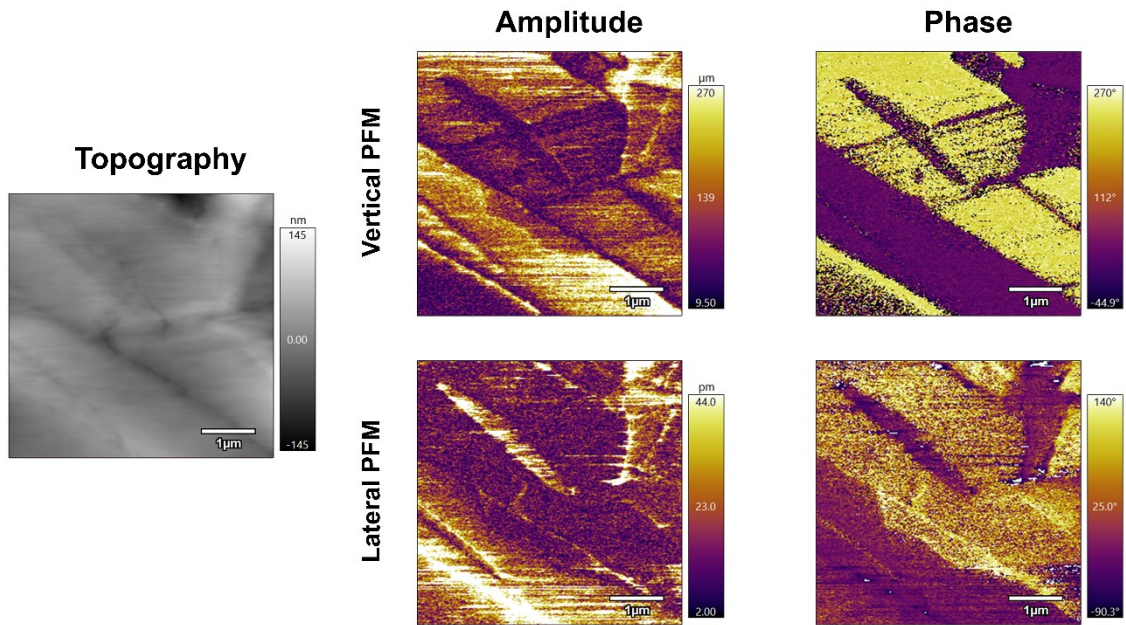

**Fig. S8** Another set of PFM images including topography image; vertical and lateral PFM amplitudes and phase images.

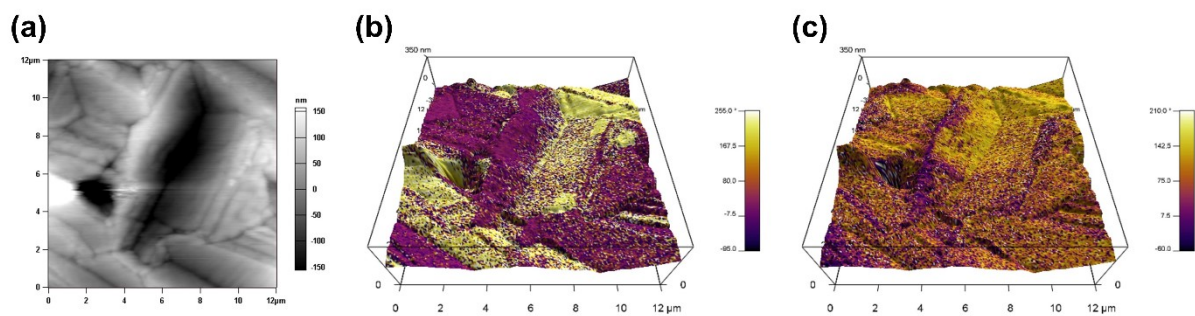

**Fig. S9** Topography images of PFM. (a) Topography images; lateral (b) and vertical (c) PFM phase images overlaid on the 3D topography of the surface for a thin film of **1**.

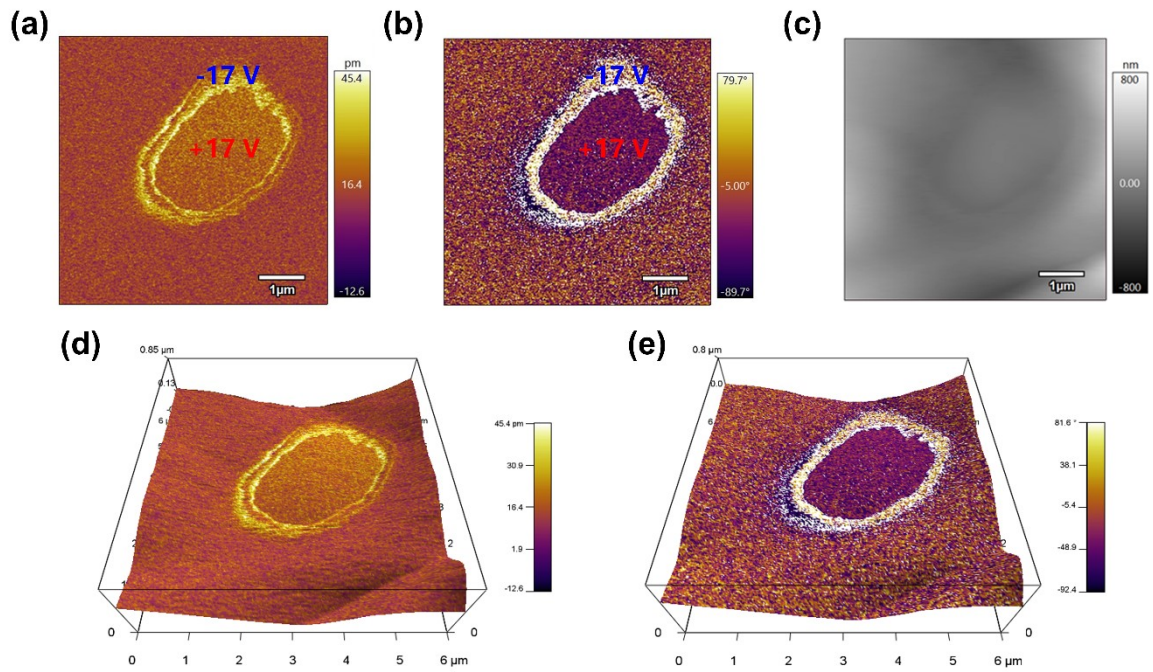

**Fig. S10** The reversible polarization switching by the electric field. (a) PFM amplitudes, (b) phase and (c) topography images; (d) PFM amplitudes images and (e) phase images overlaid on the 3D topography.

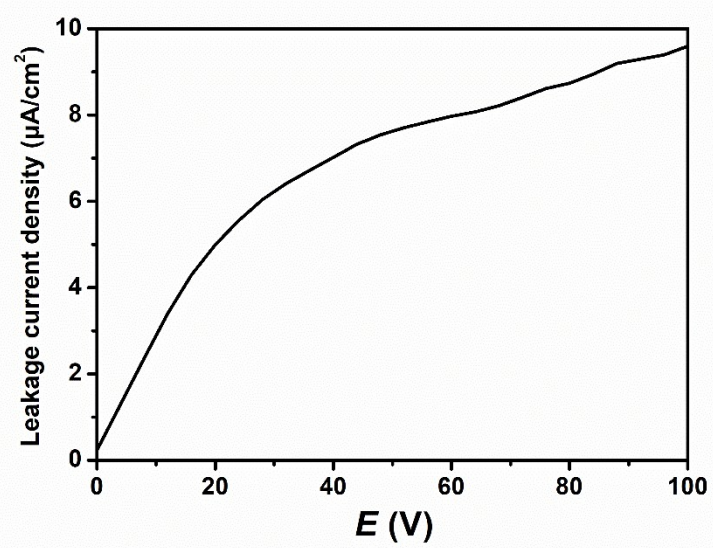

**Fig. S11** The leakage current density of compound 1.

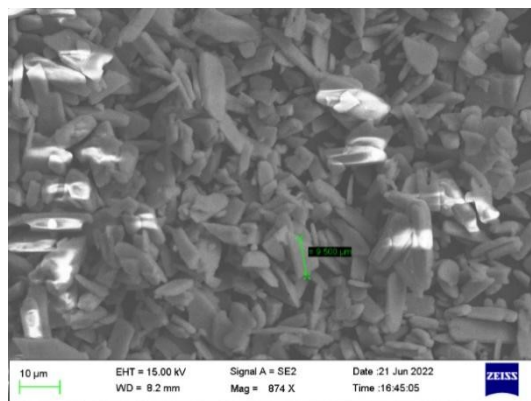

**Fig. S12** SEM image for particles of **1**.



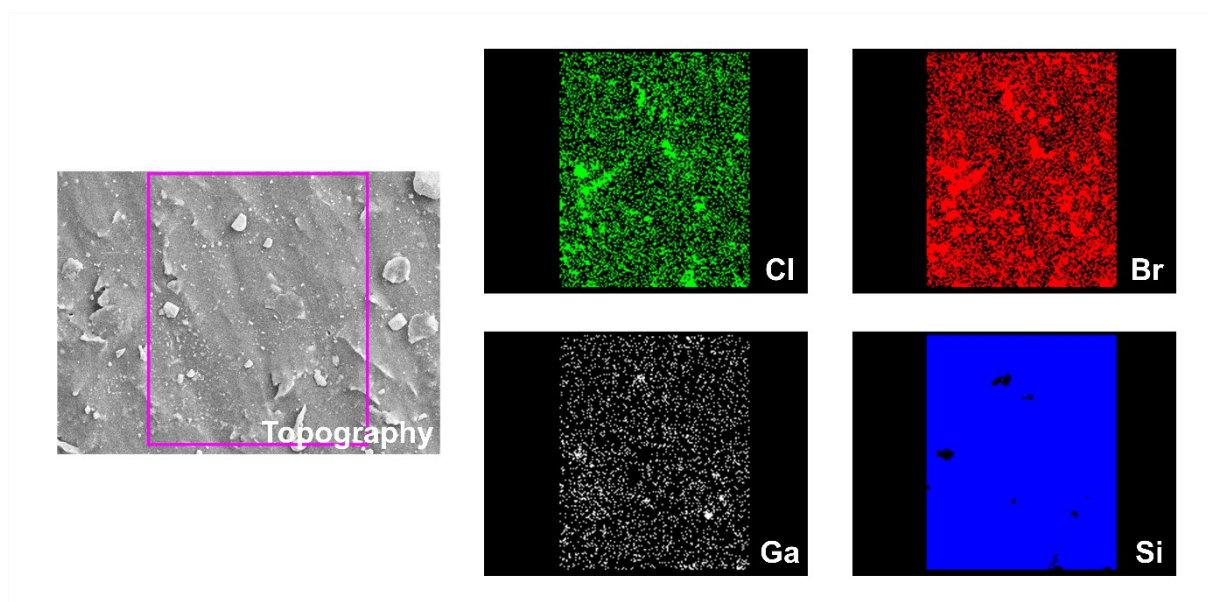

**Fig. S13** Scanning electron microscopy (SEM) and mapping images for the 15 wt% 1@PDMS film surface.



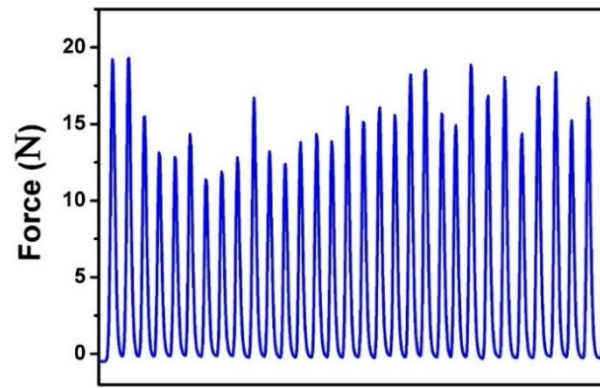

**Fig. S14** Plots of force applied with thumb pressure.

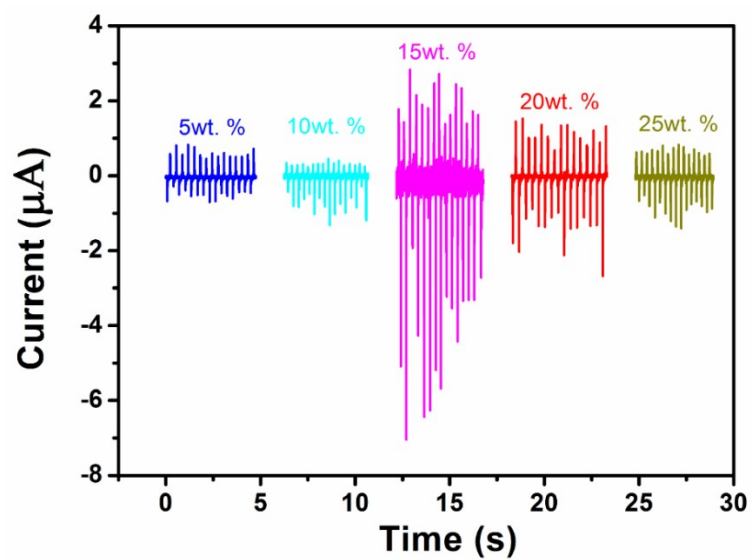

**Fig. S15**  $I_{sc}$  data for 1@PDMS with different mass fractions with thumb pressure.

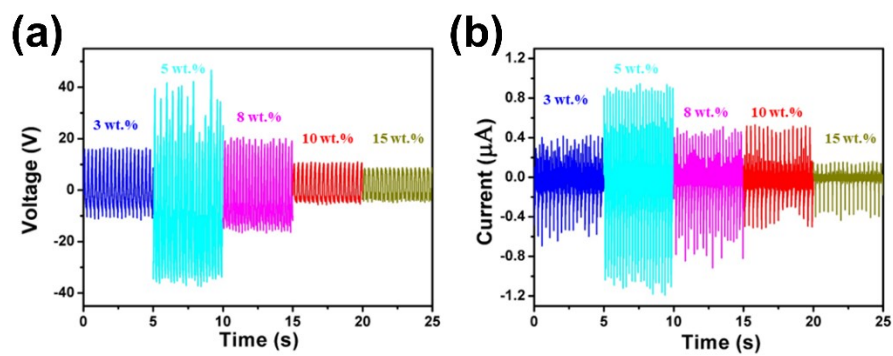

**Fig. S16** The performance of 1@PDMS built by sample after grinding with different mass fractions. (a)  $V_{oc}$  data; (b)  $I_{sc}$  data.

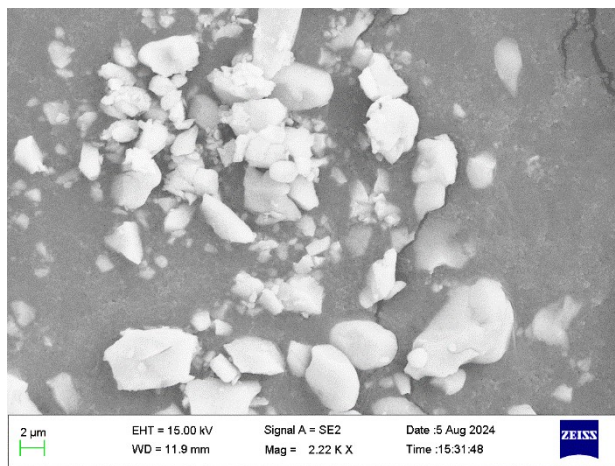

**Fig. S17** SEM image of the ground sample **1**. The ground sample particles do not exhibit any specific morphology and exhibit irregular sizes, with the presence of large agglomerated particles ( $> 5 \mu\text{m}$ ).

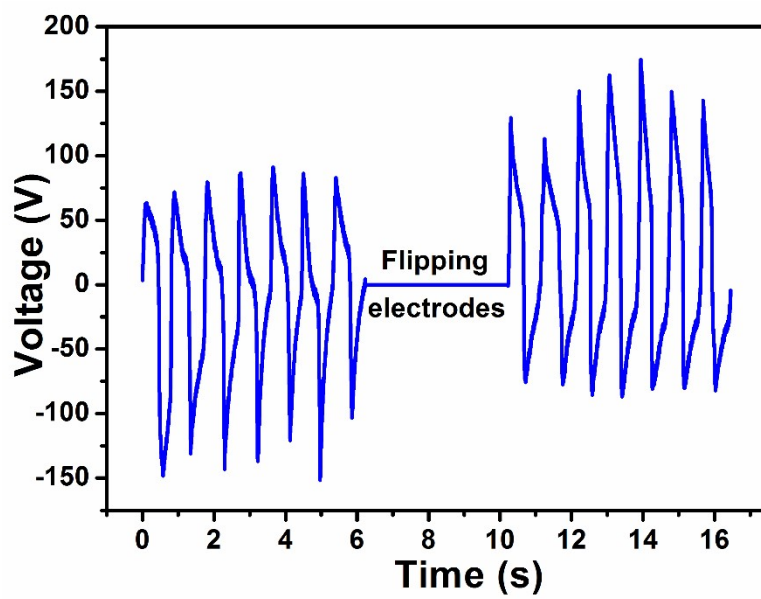

**Fig. S18**  $V_{oc}$  for 15 wt% 1@PDMS PEGs when flipping the electrodes.

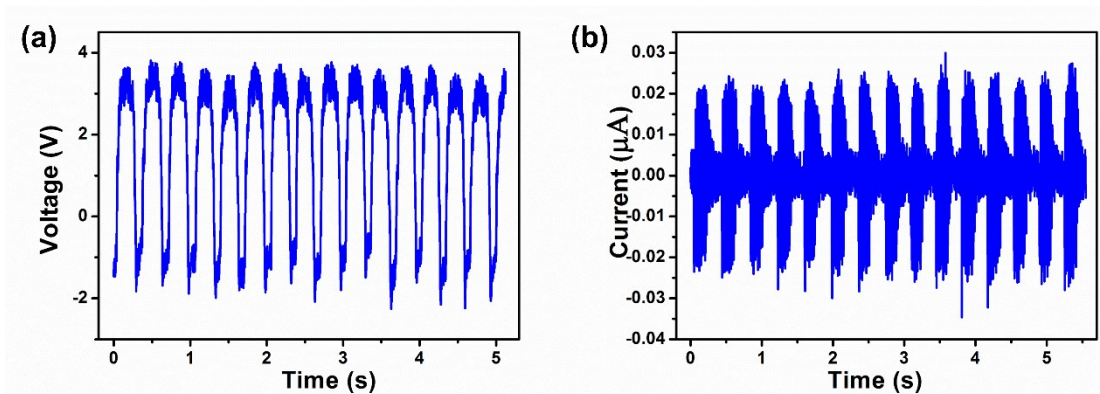

**Fig. S19** The performance of pure PDMS with thumb pressure. (a)  $V_{oc}$  data; (b)  $I_{sc}$  data.

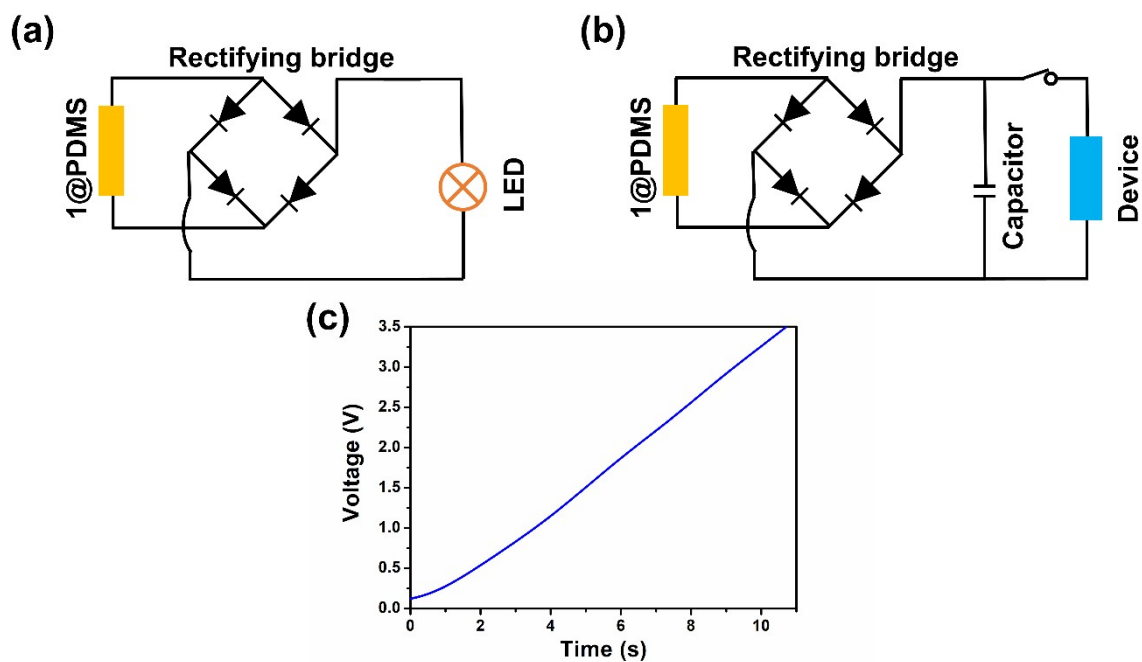

**Fig. S20** Charge transfer circuit. (a) 15% 1@PDMS with a full-wave rectifying bridge to power 100 LEDs; (b) 15% 1@PDMS with a full-wave rectifying bridge and a 3.3  $\mu\text{F}$  parallel capacitor to power a calculator / an electronic watch; (c) voltage-charging time of charging 3.3  $\mu\text{F}$  capacitors using 15% 1@PDMS.

### 3. Supplementary Tables

**Table S1** Crystal data for **1** at 300 K.

| Compound                                                                    | <b>1</b>                                                           |
|-----------------------------------------------------------------------------|--------------------------------------------------------------------|
| Empirical formula                                                           | C <sub>5</sub> H <sub>13</sub> Br <sub>4</sub> ClGaN               |
| Formula weight                                                              | 514.19                                                             |
| Temperature (K)                                                             | 293(2)                                                             |
| Crystal system                                                              | orthorhombic                                                       |
| Space group                                                                 | <i>Pca</i> 2 <sub>1</sub>                                          |
| <i>a</i> (Å)                                                                | 14.0655(8)                                                         |
| <i>b</i> (Å)                                                                | 7.6705(5)                                                          |
| <i>c</i> (Å)                                                                | 13.2164(7)                                                         |
| $\alpha$ (deg.)                                                             | 90                                                                 |
| $\beta$ (deg.)                                                              | 90                                                                 |
| $\gamma$ (deg.)                                                             | 90                                                                 |
| <i>V</i> (Å <sup>3</sup> )                                                  | 1425.91(14)                                                        |
| <i>Z</i>                                                                    | 4                                                                  |
| $\rho_{cal}$ (g · cm <sup>-3</sup> )                                        | 2.395                                                              |
| $\mu$ (mm <sup>-1</sup> )                                                   | 17.295                                                             |
| <i>F</i> (000)                                                              | 956.0                                                              |
| Reflections collected                                                       | 3153                                                               |
| <i>R</i> <sub>int</sub>                                                     | 0.0408                                                             |
| Data/restraints/parameters                                                  | 1616/102/132                                                       |
| GOOFs                                                                       | 1.055                                                              |
| <i>R</i> <sub>1</sub> / <i>wR</i> <sub>2</sub> [ <i>I</i> > 2σ( <i>I</i> )] | <i>R</i> <sub>1</sub> = 0.0616,<br><i>wR</i> <sub>2</sub> = 0.1595 |
| <i>R</i> <sub>1</sub> / <i>wR</i> <sub>2</sub> (all data)                   | <i>R</i> <sub>1</sub> = 0.0761,<br><i>wR</i> <sub>2</sub> = 0.1809 |
| Largest diff. peak/hole (e · Å <sup>-3</sup> )                              | 1.12/-1.18                                                         |



**Table S2** Distances between the Br atoms of the  $[\text{GaBr}_4]^-$  anion and surrounding atoms.

|                        | bond lengths [ $\text{\AA}$ ] |                       | bond lengths [ $\text{\AA}$ ] |
|------------------------|-------------------------------|-----------------------|-------------------------------|
| Br1—C5 <sup>i</sup>    | 3.528                         | Br1—C2 <sup>ii</sup>  | 3.890                         |
| Br1—Br4 <sup>iii</sup> | 3.880                         | Br2—C7                | 3.889                         |
| Br2—C5A                | 3.737                         | Br2—C5 <sup>iv</sup>  | 3.708                         |
| Br2—C2 <sup>v</sup>    | 3.880                         | Br3—C5A <sup>vi</sup> | 3.554                         |
| Br3—Br4 <sup>vii</sup> | 3.915                         |                       |                               |

Symmetry codes: (i)  $2-x, 2-y, 1/2+z$ ; (ii)  $2-x, 3-y, 1/2+z$ ; (iii)  $x+1/2, 3-y, z$ ; (iv)  $x+1/2, 2-y, -z$ ; (v)  $x-1/2, 3-y, z$ ; (vi)  $-x+3/2, y, z+1/2$ ; (vii)  $x, y-1, z$ .

**Table S3** The  $g_{33}$  and  $d_{33}$  values of **1** and other molecular ferroelectrics.

| samples                                                                                                               | $d_{33}$<br>(pC·N <sup>-1</sup> ) | $g_{33}$<br>( $\times 10^{-3}$<br>V·m·N <sup>-1</sup> ) | Crystal form    | Reference |
|-----------------------------------------------------------------------------------------------------------------------|-----------------------------------|---------------------------------------------------------|-----------------|-----------|
| DIPAB                                                                                                                 | 11                                | 19.7                                                    | Single crystal  | 1         |
| TGS                                                                                                                   | 22                                | 37                                                      | Single crystal  | 1         |
| Croconic acid (CA)                                                                                                    | 5                                 | 47.1                                                    | Single crystal  | 1         |
| Imidazolium perchlorate                                                                                               | 41                                | 257.3                                                   | Single crystal  | 2         |
| (ATHP) <sub>2</sub> PbBr <sub>4</sub>                                                                                 | 75                                | 660                                                     | Single crystal  | 3         |
| TMCM <sub>2</sub> SnCl <sub>6</sub>                                                                                   | 137                               | 980                                                     | Single crystal  | 4         |
| TMCMMnCl <sub>3</sub>                                                                                                 | 185                               | 1681                                                    | Single crystal  | 1         |
| TMBMMnBr <sub>3</sub>                                                                                                 | 112                               | 1120                                                    | Single crystal  | 5         |
| TMCMCdBr <sub>3</sub>                                                                                                 | 139                               | 1962                                                    | Single crystal  | 6         |
| MDABCO-NH <sub>4</sub> I <sub>3</sub>                                                                                 | 14                                | 79                                                      | Single crystal  | 7         |
| C <sub>6</sub> H <sub>5</sub> N(CH <sub>3</sub> ) <sub>3</sub> CdBr <sub>2</sub> Cl <sub>0.75</sub> I <sub>0.25</sub> | 324                               | 3595                                                    | Single crystal  | 8         |
| (TMFM) <sub>x</sub> (TMCM) <sub>1-x</sub> CdCl <sub>3</sub>                                                           | 1540                              | 9506                                                    | Single crystal  | 9         |
| NDABCO-NH <sub>4</sub> -Br <sub>3</sub>                                                                               | 63                                | 252                                                     | Single crystal  | 10        |
| [Me <sub>3</sub> NCH <sub>2</sub> Cl]CdBrCl <sub>2</sub>                                                              | 440                               | 6215                                                    | Single crystal  | 11        |
| (HaaOH)BF <sub>4</sub>                                                                                                | 22                                | 165.7                                                   | Single crystal  | 12        |
| [Ph <sub>3</sub> MeP] <sub>4</sub> [Ni(NCS) <sub>6</sub> ]                                                            | 8                                 | 63.27                                                   | Single crystal  | 13        |
| [3.2.1-abco]ReO <sub>4</sub>                                                                                          | 118                               | 131                                                     | polycrystalline | 14        |
| NMe <sub>3</sub> BH <sub>3</sub>                                                                                      | 10–16                             | 174-278                                                 | polycrystalline | 15        |
| [C(NH <sub>2</sub> ) <sub>3</sub> ][ClO <sub>4</sub> ]                                                                | 15                                | 292                                                     | polycrystalline | 16        |
| [(CH <sub>3</sub> ) <sub>4</sub> N][FeCl <sub>4</sub> ]                                                               | 80                                | 1434                                                    | polycrystalline | 17        |
| [(CH <sub>3</sub> ) <sub>4</sub> N][FeBrCl <sub>3</sub> ]                                                             | 110                               | 1420                                                    | polycrystalline | 17        |
| [(CH <sub>3</sub> ) <sub>4</sub> N][GaCl <sub>4</sub> ]                                                               | 80                                | 2008                                                    | polycrystalline | 18        |
| [AH][ReO <sub>4</sub> ]                                                                                               | 90                                | 338                                                     | polycrystalline | 19        |
| TMCMGaCl <sub>4</sub>                                                                                                 | 226                               | 1318                                                    | polycrystalline | 20        |
| <b>1</b>                                                                                                              | 454                               | 10910                                                   | polycrystalline | This work |

**Table S4** The  $d_{33} \times g_{33}$  of **1** vs. other ferroelectrics.

| Sample                                                                                                                | $d_{33}$<br>(pC·N <sup>-1</sup> ) | $g_{33}$ ( $\times 10^{-3}$<br>V·m·N <sup>-1</sup> ) | $d_{33} \times g_{33}$ ( $\times$<br>$10^{-12}$ m <sup>2</sup> ·N <sup>-1</sup> ) | Reference |
|-----------------------------------------------------------------------------------------------------------------------|-----------------------------------|------------------------------------------------------|-----------------------------------------------------------------------------------|-----------|
| PZT507                                                                                                                | 700                               | 20.0                                                 | 14                                                                                | 21        |
| APC855                                                                                                                | 620                               | 21.0                                                 | 12.6                                                                              | 21        |
| Pz39                                                                                                                  | 480                               | 30.0                                                 | 14.4                                                                              | 21        |
| PIN-PMN-PT                                                                                                            | 3480 ( $d_{15}$ )                 | 37.25 ( $g_{15}$ )                                   | 129.6                                                                             | 22        |
| Soft ceramic                                                                                                          | 920 ( $d_{15}$ )                  | 38.72 ( $g_{15}$ )                                   | 35.9                                                                              | 22        |
| PVDF                                                                                                                  | 33                                | 286.7                                                | 9.46                                                                              | 23        |
| (ATHP) <sub>2</sub> PbBr <sub>4</sub>                                                                                 | 75                                | 660.3                                                | 50.2                                                                              | 3         |
| TMCM <sub>2</sub> SnCl <sub>6</sub>                                                                                   | 137                               | 980                                                  | 134.3                                                                             | 4         |
| TMCMnCl <sub>3</sub>                                                                                                  | 185                               | 1681                                                 | 311                                                                               | 1         |
| TMCMCdBr <sub>3</sub>                                                                                                 | 139                               | 1962                                                 | 272.7                                                                             | 6         |
| C <sub>6</sub> H <sub>5</sub> N(CH <sub>3</sub> ) <sub>3</sub> CdBr <sub>2</sub> Cl <sub>0.75</sub> I <sub>0.25</sub> | 324                               | 3595                                                 | 1222.8                                                                            | 8         |
| [N(CH <sub>3</sub> ) <sub>4</sub> ]FeCl <sub>4</sub>                                                                  | 80                                | 1434                                                 | 114.7                                                                             | 17        |
| [N(CH <sub>3</sub> ) <sub>4</sub> ]GaCl <sub>4</sub>                                                                  | 80                                | 2008                                                 | 160.6                                                                             | 18        |
| [N(CH <sub>3</sub> ) <sub>3</sub> CH <sub>2</sub> Cl]GaCl <sub>4</sub>                                                | 226                               | 5672                                                 | 1281.9                                                                            | 20        |
| <b>1</b>                                                                                                              | 454                               | 10910                                                | 4953.1                                                                            | This work |

**Table S5** The  $P_s$ ,  $d_{33}$  and  $g_{33}$  values of **1** and other similar molecular ferroelectrics.

| Sample                                                       | $P_s$ ( $\mu\text{C}\cdot\text{cm}^{-2}$ ) | $d_{33}$ ( $\text{pC}\cdot\text{N}^{-1}$ ) | $g_{33}$ ( $\times 10^{-3}$<br>$\text{V}\cdot\text{m}\cdot\text{N}^{-1}$ ) | Reference |
|--------------------------------------------------------------|--------------------------------------------|--------------------------------------------|----------------------------------------------------------------------------|-----------|
| $[\text{N}(\text{CH}_3)_4]\text{FeCl}_4$                     | 2.0                                        | 80                                         | 1434                                                                       | 17        |
| $[\text{N}(\text{CH}_3)_4]\text{GaCl}_4$                     | 3.8                                        | 80                                         | 2008                                                                       | 18        |
| $[\text{N}(\text{CH}_3)_3\text{CH}_2\text{Cl}]\text{GaCl}_4$ | 6.4                                        | 226                                        | 5672                                                                       | 20        |
| <b>1</b>                                                     | 9.5                                        | 454                                        | 10910                                                                      | This work |

**Table S6** The dipole moment values of organic cations.

| Organic cations                                              | *Dipole moment (Debye) |
|--------------------------------------------------------------|------------------------|
| $[\text{N}(\text{CH}_3)_4]^+$                                | 0                      |
| $[\text{N}(\text{CH}_3)_3\text{CH}_2\text{Cl}]^+$            | 4.24                   |
| $[\text{N}(\text{CH}_3)_3\text{CH}_2\text{CH}_2\text{Cl}]^+$ | 6.73                   |

Note: \*Dipole moment value was determined theoretically by utilizing Gaussian 09 software at the B3LYP/def2TZVP level of theory.

**Table S7** Power density of **1@PDMS** vs. those for PEGs previously used in the same PDMS matrix.

| Piezoelectric Materials                                                        | Pressure | $V_{oc}$<br>(V) | $J_{sc}$<br>( $\mu\text{A}\cdot\text{cm}^{-2}$ ) | Power<br>density<br>( $\mu\text{W}\cdot\text{cm}^{-2}$ ) | ref          |
|--------------------------------------------------------------------------------|----------|-----------------|--------------------------------------------------|----------------------------------------------------------|--------------|
| [Me <sub>3</sub> NCH <sub>2</sub> CH <sub>2</sub> OH]CdCl <sub>3</sub> -PDMS   | 40 N     | 55.2            | 4.02                                             | 70.9                                                     | 24           |
| [(ATHP) <sub>2</sub> PbBr <sub>2</sub> Cl <sub>2</sub> @PDMS]                  | 4.2 N    | 90              | 6.5 $\mu\text{A}$                                | 1.7                                                      | 25           |
| [BnNMe <sub>3</sub> ]CdBr <sub>4</sub> /PDMS                                   | 40 N     | 52.9            | 0.23                                             | 13.8                                                     | 26           |
| [BnNMe <sub>2</sub> <sup>n</sup> Pr] <sub>2</sub> CdBr <sub>4</sub> /PDMS      | 40 N     | 63.8            | 0.59                                             | 37.1                                                     | 26           |
| MAPbI <sub>3</sub> -PDMS                                                       | -        | 100             | 0.27                                             | 30                                                       | 27           |
| (BTMA) <sub>2</sub> CoBr <sub>4</sub> /PDMS                                    | 2.5 N    | 19.7            | 2.94                                             | 11.72                                                    | 28           |
| MASnBr <sub>3</sub> -PDMS                                                      | 0.5 MPa  | 18.8            | 13.76                                            | 74.52                                                    | 29           |
| [(CH <sub>3</sub> ) <sub>3</sub> NCH <sub>2</sub> Cl][GaCl <sub>4</sub> ]@PDMS | 1 N      | 38.1            | 1.6                                              | -                                                        | 20           |
| DPDP·PF <sub>6</sub> /PDMS                                                     | 15 N     | 8.5             | 0.28                                             | 0.13                                                     | 30           |
| TMCM <sub>2</sub> SnCl <sub>6</sub> @PDMS                                      | 4.9 N    | 81              | 2 $\mu\text{A}$                                  | 2.56                                                     | 4            |
| FAPbBr <sub>3</sub> -PDMS                                                      | 0.5 MPa  | 8.5             | 3.4                                              | 12                                                       | 31           |
| <b>1@PDMS</b>                                                                  | 20 N     | 179             | 1.6                                              | 120                                                      | This<br>work |

-: Pressure and power density values were not provided for reported ferroelectrics.

## References

- (1) Y. M. You, W. Q. Liao, D. W. Zhao, H. Y. Ye, Y. Zhang, Q. H. Zhou, X. H. Niu, J. L. Wang, P. F. Li, D. W. Fu, Z. M. Wang, S. Gao, K. L. Yang, J. M. Liu, J. Y. Li, Y. F. Yan, R. G. Xiong, An organic-inorganic perovskite ferroelectric with large piezoelectric response, *Science* 357 (2017) 306-309.
- (2) Y. Zhang, Y. M. Liu, H. Y. Ye, D. W. Fu, W. X. Gao, H. Ma, Z. G. Liu, Y. Y. Liu, W. Zhang, J. Y. Li, G. L. Yuan, R. G. Xiong, A molecular ferroelectric thin film of imidazolium perchlorate that shows superior electromechanical coupling, *Angew. Chem., Int. Ed.* 53 (2014) 5064-5068.
- (3) X. G. Chen, X. J. Song, Z. X. Zhang, P. F. Li, J. Z. Ge, Y. Y. Tang, J. X. Gao, W. Y. Zhang, D. W. Fu, Y. M. You, R. G. Xiong, Two-Dimensional Layered Perovskite Ferroelectric with Giant Piezoelectric Voltage Coefficient, *J. Am. Chem. Soc.* 142 (2020) 1077-1082.
- (4) G. G. Huang, A. A. Khan, M. M. Rana, C. Xu, R. Saritas, S. Zhang, E. Abdel-Rahmand, P. Turban, S. Ababou-Girard, C. L. Wang, D. Y. Ban, Achieving Ultrahigh Piezoelectricity in Organic-Inorganic Vacancy-Ordered Halide Double Perovskites for Mechanical Energy Harvesting, *ACS Energy Lett.* 6 (2021) 16-23.
- (5) W. Q. Liao, Y. Y. Tang, P. F. Li, Y. M. You, R. G. Xiong, Large Piezoelectric Effect in a Lead-Free Molecular Ferroelectric Thin Film, *J. Am. Chem. Soc.* 139 (2017) 18071–18077.
- (6) W. Q. Liao, Y. Y. Tang, P. F. Li, Y. M. You, R. G. Xiong, Competitive Halogen Bond in the Molecular Ferroelectric with Large Piezoelectric Response, *J. Am. Chem. Soc.* 140 (2018) 3975-3980.
- (7) H. Y. Ye, Y. Y. Tang, P. F. Li, W. Q. Liao, J. X. Gao, X. N. Hua, H. Cai, P. P. Shi, Y. M. You, R. G. Xiong Metal-free three-dimensional perovskite ferroelectrics, *Science* 361 (2018) 151–155.
- (8) Y. Z. Hu, K. Parida, H. Zhang, X. Wang, Y. X. Li, X. R. Zhou, S. A. Morris, W. H. Liew, H. M. Wang, T. Li, F. Jiang, M. M. Yang, M. Alexe, Z. H. Du, C. L. Gan, K. Yao, B. Xu, P. S. Lee, H. J. Fanet, Bond engineering of molecular ferroelectrics renders soft and high-performance piezoelectric energy harvesting materials, *Nat. Commun.* 13 (2022) 5607.
- (9) W. Q. Liao, D. W. Zhao, Y. Y. Tang, Y. Zhang, P. F. Li, P. P. Shi, X. G. Chen, Y. M. You, R. G. Xiong, A molecular perovskite solid solution with piezoelectricity stronger than lead zirconate titanate, *Science* 363 (2019) 1206-1210.
- (10) H. Zhang, Z. K. Xu, Z. X. Wang, H. Yu, H. P. Lv, P. F. Li, W. Q. Liao, R. G. Xiong, Large Piezoelectric Response in a Metal-Free Three-Dimensional Perovskite Ferroelectric, *J. Am. Chem. Soc.* 145 (2023) 4892–4899.

- (11) X. G. Chen, Y. Y. Tang, H. P. Lv, X. J. Song, H. Peng, H. Yu, W. Q. Liao, Y. M. You, R. G. Xiong, Remarkable Enhancement of Piezoelectric Performance by Heavy Halogen Substitution in Hybrid Perovskite Ferroelectrics, *J. Am. Chem. Soc.* 145 (2023) 1936–1944.
- (12) Y. A. Xiong, S. S. Duan, H. H. Hu, J. Yao, Q. Pan, T. T. Sha, X. Wei, H. R. Ji, J. Wu, Y. M. You, Enhancement of phase transition temperature through hydrogen bond modification in molecular ferroelectrics, *Nat. Commun.* 15 (2024) 4470.
- (13) T. Vijayakanth, F. Ram, B. Praveenkumar, K. Shanmuganathan, R. Boomishankar. Piezoelectric Energy Harvesting from a Ferroelectric Hybrid Salt  $[\text{Ph}_3\text{MeP}]_4[\text{Ni}(\text{NCS})_6]$  Embedded in a Polymer Matrix, *Angew. Chem. Int. Ed.* 59 (2020) 10368–10373.
- (14) Y. Ai, P. F. Li, X. G. Chen, H. P. Lv, Y. R. Weng, Y. Shi, F. Zhou, R. G. Xiong, W. Q. Liao, The First Ring Enlargement Induced Large Piezoelectric Response in a Polycrystalline Molecular Ferroelectric, *Adv. Sci.* 10 (2023) 2302426.
- (15) Y. Zhang, A. M. Hopkins, D. J. Liptrot, H. Khanbareh, P. Groen, X. F. Zhou, D. Zhang, Y. X. Bao, K. C. Zhou, C. R. Bowen, D. R. Carbery, Harnessing Plasticity in an Amine-Borane as a Piezoelectric and Pyroelectric Flexible Film, *Angew. Chem. Int. Ed.* 59 (2020) 7808-7812.
- (16) Q. Pan, Z. B. Liu, H. Y. Zhang, W. Y. Zhang, Y. Y. Tang, Y. M. You, P. F. Li, W. Q. Liao, P. P. Shi, R. W. Ma, R. Y. Wei, R. G. Xiong, A Molecular Polycrystalline Ferroelectric with Record-High Phase Transition Temperature, *Adv. Mater.* 29 (2017) 1700831-1700837.
- (17) D. Li, X. M. Zhao, H. X. Zhao, X. W. Dong, L. S. Long, L. S. Zheng, Construction of Magnetolectric Composites with a Large Room-Temperature Magnetolectric Response through Molecular–Ionic Ferroelectrics, *Adv. Mater.* 30 (2018) 1803716.
- (18) J. Harada, N. Yoneyama, S. Yokokura, Y. Takahashi, A. Miura, N. Kitamura, T. Inabe, Ferroelectricity and Piezoelectricity in Free-Standing Polycrystalline Films of Plastic Crystals, *J. Am. Chem. Soc.* 140 (2018) 346–354.
- (19) J. Harada, Y. Kawamura, Y. Takahashi, Y. Uemura, T. Hasegawa, H. Taniguchi, K. Maruyama, Plastic/Ferroelectric Crystals with Easily Switchable Polarization: Low-Voltage Operation, Unprecedentedly High Pyroelectric Performance, and Large Piezoelectric Effect in Polycrystalline Forms, *J. Am. Chem. Soc.* 141 (2019) 9349-9357.
- (20) B. Wang, J. F. Hong, Y. T. Yang, H. X. Zhao, L. S. Long, L. S. Zheng, Achievement of a giant piezoelectric coefficient and piezoelectric voltage coefficient through plastic molecular-based ferroelectric materials, *Matter* 5 (2022) 1296-1304.
- (21) M. P. Zheng, Y. D. Hou, M. K. Zhu, H. Yan, Research Progress of Piezoelectric Ceramics for Energy Harvesting, *J. Chin. Ceram. Soc.* 44 (2016) 359-366.



- (22) X. Y. Gao, C. R. Qiu, G. Li, M. Ma, S. Yang, Z. Xu, F. Li, High output power density of a shear-mode piezoelectric energy harvester based on  $\text{Pb}(\text{In}_{1/2}\text{Nb}_{1/2})\text{O}_3\text{-Pb}(\text{Mg}_{1/3}\text{Nb}_{2/3})\text{O}_3\text{-PbTiO}_3$  single crystals, *Appl. Energ.* 271 (2020) 115193.
- (23) M. Y. Li, H. J. Wondergem, M. J. Spijkman, K. Asadi, I. Katsouras, P. W. M. Blom, D. M. de Leeuw, Revisiting the  $\delta$ -phase of poly(vinylidene fluoride) for solution-processed ferroelectric thin films. *Nat. Mater.* 12 (2013) 433-438.
- (24) S. Deswal, S. K. Singh, R. Pandey, P. Nasa, D. Kabra, B. Praveenkumar, S. Ogale, R. Boomishanka, Neutral 1D Perovskite-Type  $\text{ABX}_3$  Ferroelectrics with High Mechanical Energy Harvesting Performance, *Chem. Mater.* 32 (2020) 8333-8341.
- (25) A. A. Khan, G. G. Huang, M. M. Rana, N. Q. Mei, M. Biondi, S. Rassel, N. Tanguy, B. Sun, Z. Leonenko, N. Yan, C. L. Wang, S. H. Xu, D. Y. Ban, Superior transverse piezoelectricity in organic-inorganic hybrid perovskite nanorods for mechanical energy harvesting, *Nano Energy* 86 (2021) 106039.
- (26) S. Deswal, S. K. Singh, P. Rambabu, P. Kulkarni, G. Vaitheeswaran, B. Praveenkumar, S. Ogale, R. Boomishankar, Flexible Composite Energy Harvesters from Ferroelectric  $\text{A}_2\text{MX}_4$ -Type Hybrid Halogenometallates, *Chem. Mater* 31 (2019) 4545-4552.
- (27) J. Dhar, S. Sil, N. A. Hoque, A. Dey, S. Das, P. P. Ray, D. Sanyal, Lattice-Defect-Induced Piezo Response in Methylammonium-Lead-Iodide Perovskite Based Nanogenerator, *ChemistrySelect* 3 (2018) 5304-5312.
- (28) T. M. Guo, Y. J. Gong, Z. G. Li, Y. M. Liu, W. Li, Z. Y. Li, X. H. Bu, A New Hybrid Lead-Free Metal Halide Piezoelectric for Energy Harvesting and Human Motion Sensing, *Small* 18 (2022) 2103829.
- (29) S. Ippili, V. Jella, J. Kim, S. Hong, S. G. Yoon, Unveiling Predominant Air-Stable Organotin Bromide Perovskite toward Mechanical Energy Harvesting, *ACS Appl. Mater. Interfaces* 12 (2020) 16469-16480.
- (30) T. Vijayakanth, A. K. Srivastava, F. Ram, P. Kulkarni, K. Shanmuganathan, B. Praveenkumar, R. Boomishankar, A Flexible Composite Mechanical Energy Harvester from a Ferroelectric Organoamino Phosphonium Salt, *Angew. Chem. Int. Ed.* 57 (2018) 9054-9058.
- (31) R. Ding, He. Liu, X. L. Zhang, J. X. Xiao, R. Kishor, H. X. Sun, B. W. Zhu, G. Chen, F. Gao, X. H. Feng, J. S. Chen, X. D. Chen, X. W. Sun, Y. J. Zheng, Flexible Piezoelectric Nanocomposite Generators Based on Formamidinium Lead Halide Perovskite Nanoparticles, *Adv. Funct. Mater.* 26 (2016) 7708-7716.
